# Supplementary material
Source: ML conference proceedings conference paper supplement (https://proceedings.neurips.cc/paper_files/paper/2017/hash/8ca8da41fe1ebc8d3ca31dc14f5fc56c-Abstract.html)
Supplement: Supplementary file [file 8ca8da41fe1ebc8d3ca31dc14f5fc56c-Supplemental.zip]

---

# Learning Active Learning from Data.

## Supplemental Materials

---

Anonymous Author(s)

Affiliation

Address

email

### A Implementation details

**Representative dataset generation** As a *representative* dataset in *cold start* experiments we use synthetic 2D datasets where each class comes from a Gaussian distribution with a randomly generated mean and variance. We set the size of training and test dataset to 400 and 4000 respectively and the proportion of class 0 varies from 0.1 to 0.9. Each mean is drawn independently from a uniform distribution from 0 to 1 and the covariance is obtained by multiplying matrices whose entries are drawn uniformly between  $-0.5$  and  $0.5$  with their transposes. The LAL data generation parameters of Sec. 3 are set to the following values:  $M = 100$ ,  $T = 48$ ,  $Q = 500$ . For every new initialization we use a new representative dataset that insures that the learnt strategy can generalize to various problems.

In *warm start* experiments, we used 100 or 200 samples (in *Splice* and *Higgs* datasets correspondingly), out of which 40% were used to estimate the test error and 60% for collecting LAL data. Besides, we used multiple permutations of training and testing data to compensate for the limited amount of data (compared to the synthetic data). The LAL data generation parameters are the following. For *Splice* dataset,  $Q = 100$  and  $M = 10$ ,  $\tau = 10, 14, \dots, 48$ ,  $T = 12$ . For *Higgs* dataset,  $Q = 100$ ,  $M = 10$  and  $\tau = 50, 55, \dots, 110$ ,  $T = 12$ . The experiments show that is selected values are enough to interpolate between the learning states.

**Learning state parameters for GP** When we use GP as a classifier, we operate on the following features: a) predicted probability  $p(y = 0|\mathcal{D}_t, x)$  b) predicted variance by GP c) variance and d) lengthscale of RBF kernel e) kernel density estimation for  $x$  with respect to labeled and f) unlabeled samples g) size of  $L_t$ .

**Cross-validation of LAL strategies** The LAL regressor is represented by RF regressor that requires a set of meta-parameters. Their values were set with a cross validation of a regression problem with the regression performance is measured by R squared metrics. The cross-validated parameters for the LAL strategies can be found in a Tab 1

Table 1: Cross-validated parameters of LAL strategies

| Strategy           | Dataset       | # estimators | max depth of trees | max features per split |
|--------------------|---------------|--------------|--------------------|------------------------|
| LAL-independent-2D | All           | 2000         | 40                 | 6                      |
| LAL-iterative-2D   | All           | 1000         | 30                 | 7                      |
| LAL-independent-WS | <i>Splice</i> | 500          | 10                 | 6                      |
| LAL-independent-WS | <i>Higgs</i>  | 1000         | 40                 | 7                      |

## 26 B Detailed descriptions of datasets

27 **2 Gaussian clouds** When two Gaussian clouds datasets are used in AL experiments, they are  
 28 generated with the same procedure as for the representative dataset in *cold start* (see Sec. A).  
 29 Parameters of the data generation process are set at random every time, thus these datasets are not  
 30 seen by LAL. A few examples of these datasets are depicted in Fig. 1

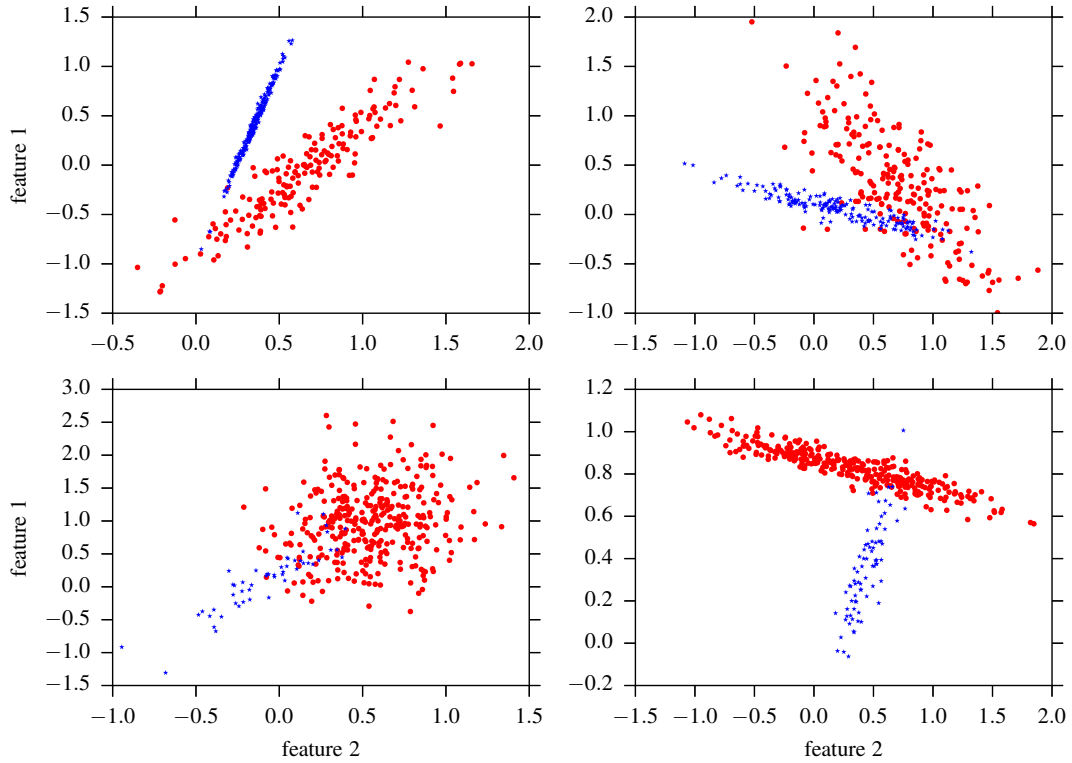

Figure 1: 4 examples of the synthetic datasets with as a representative dataset and in the experiments with 2 Gaussian clouds.

31 **Striatum** This dataset consists of 3D Electron Microscopy stack of rat neural tissue from striatum [5,  
 32 3] (Fig. 2). The train stack is of size  $318 \times 711 \times 422$  pixels and the test stack is of size  $318 \times 711 \times 450$   
 33 with the resolution of 5nm in all three spatial orientations. The task is to detect and segment  
 34 mitochondria – intracellular structures that supply the cell with its energy. It is a laborious task for  
 35 neuroscientists to annotate sufficient amounts of data to learn a classifier. Furthermore, the visual  
 36 appearance varies significantly for different areas in the brain, for different animal species and for  
 37 different settings of the equipment. The images are oversegmented with [1] and features are extracted  
 38 according to Lucchi et al. [5]. The properties of the resulting dataset are summarized in Tab. 2

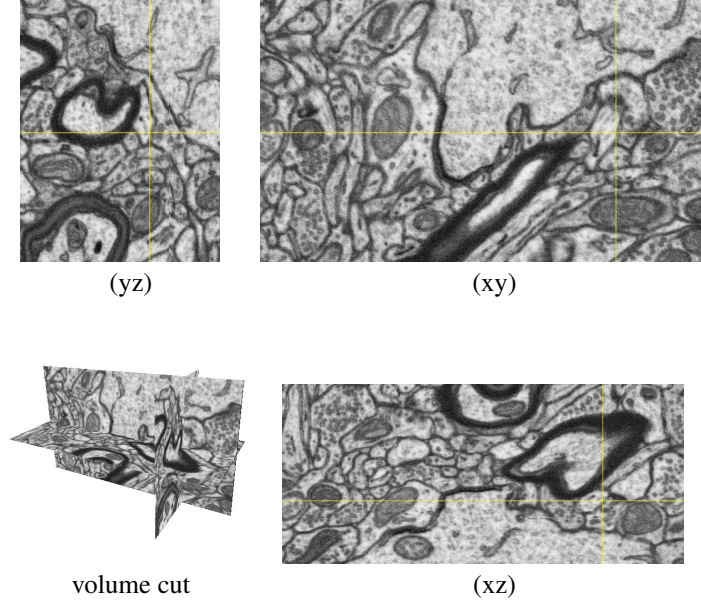

Figure 2: Interface of the FIJI Visualization API, which is extensively used to interact with 3D image stacks. The user is presented with three orthogonal planar slices of the stack. While effective when working slice by slice, this is extremely cumbersome for random access to voxels anywhere in the 3D stack, which is what a naive AL implementation would require.

Table 2: Parameters of the datasets.

| Dataset               | Dimensions | # training samples | # test samples | positive class % |
|-----------------------|------------|--------------------|----------------|------------------|
| <i>2 Gauss clouds</i> | 2          | 400                | 4000           | 50               |
| <i>Checkerboard</i>   | 2          | 1000               | 1000           | 50               |
| <i>Striatum</i>       | 272        | 276 130            | 294 496        | 11.59            |
| <i>Striatum mini</i>  | 272        | 2000               | 2000           | 11.59            |
| <i>MRI</i>            | 188        | 22 934             | 22 562         | 5.99             |
| <i>MRI mini</i>       | 188        | 2000               | 2000           | 5.99             |
| <i>Credit</i>         | 30         | 142 403            | 142 404        | 0.17             |
| <i>Splice</i>         | 60         | 1000               | 2175           | 48.09            |
| <i>Higgs</i>          | 30         | 125 000            | 125 000        | 34.26            |

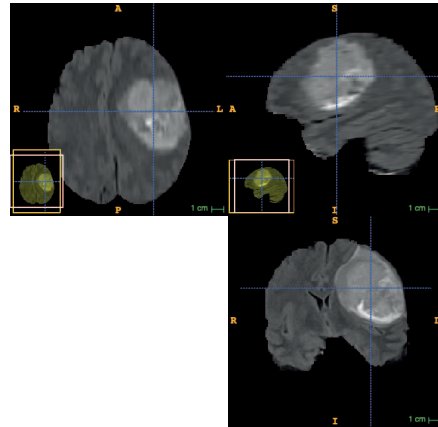

Figure 3: bla bla

39 **MRI** 20 MRI brain scans of Fig. 3 are obtained from BRATS competition [6]. The task is to  
40 segment brain tumor in T1, T2, FLAIR, and post-Gadolinium T1 MR images. We follow the protocol  
41 similar to the described in *Striatum* and oversegment stacks first and then extract feature with the  
42 convolutions of images with standard filters such as Gaussian, gradient filter, tensor, Laplacian of  
43 Gaussian and Hessian with different parameters. Remember that different permutations of training  
44 and testing data are used in AL experiments in order to better assess the classification quality.  
45 However, in imaging domain the samples (pixels) are not independent. This in *MRI* we permute the  
46 whole scans of different patients and in *Striatum* the size of the test stack is big enough ( 300 000  
47 samples) to evaluate prediction quality accurately.

48 **Credit card** The task is to detect credit card fraud transactions in transaction made by European  
49 cardholders in September 2013 [2]. The obtained 30 features are the result of PCA on the real features  
50 that are not provided due to the confidentiality issues. This is highly imbalanced dataset with only  
51 0.17% of fraud transactions among normal transactions (see Tab. 2).

52 **Splice** In this dataset from the domain of molecular biology, our task is to detect splice junctions  
53 between exons and introns in DNA sequences [4]. The sequences attributes are encoded numerically  
54 and a problem is formulated as a binary classification task.

55 **Higgs** This dataset from the domain of high energy physics contains the data that simulates the  
56 ATLAS experiment [? ]. Higgs Boson detection challenge has its task to classify events into classes  
57 of tau tau decay of a Higgs boson and background noise. We preprocess the data by replacing missing  
58 feature values with the median of the corresponding feature.

## 59 C Additional experimental results

60 Due to the space constraints, figures in the main manuscript are small and hard to see. Thus, we show  
 61 them again here with a higher resolution. Moreover, we present experiments with additional quality  
 62 measures that couldn't fit in the main paper.

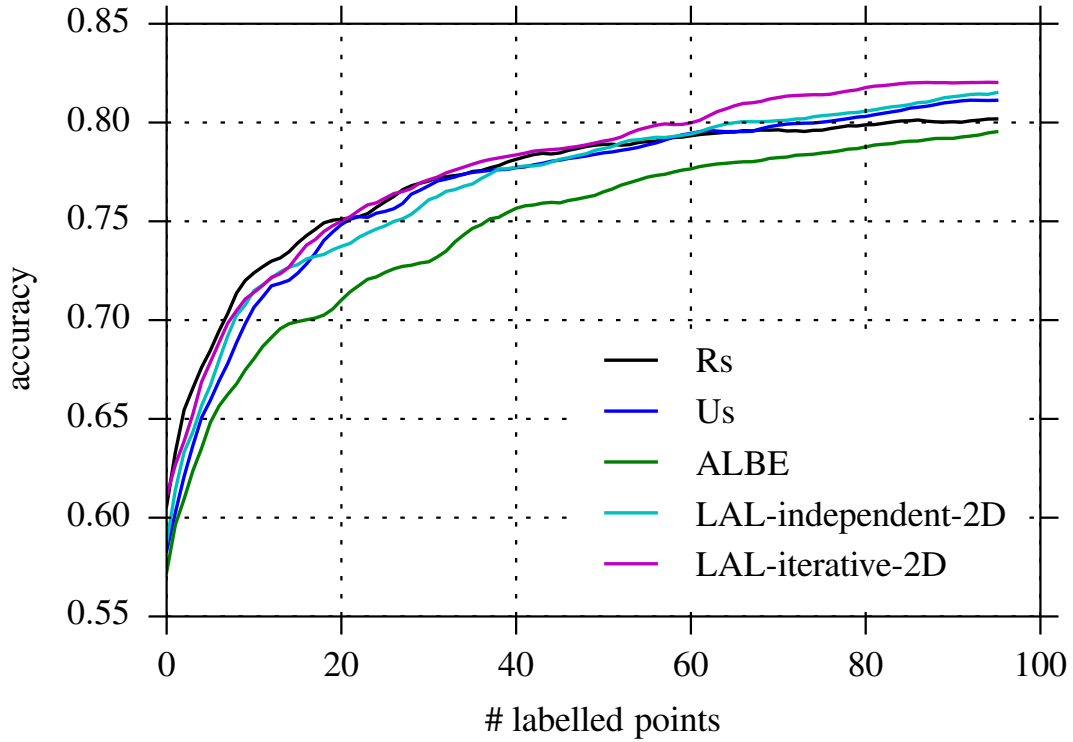

Figure 4: Experiments on synthetic data. 2 Gaussian clouds, RF classifier.

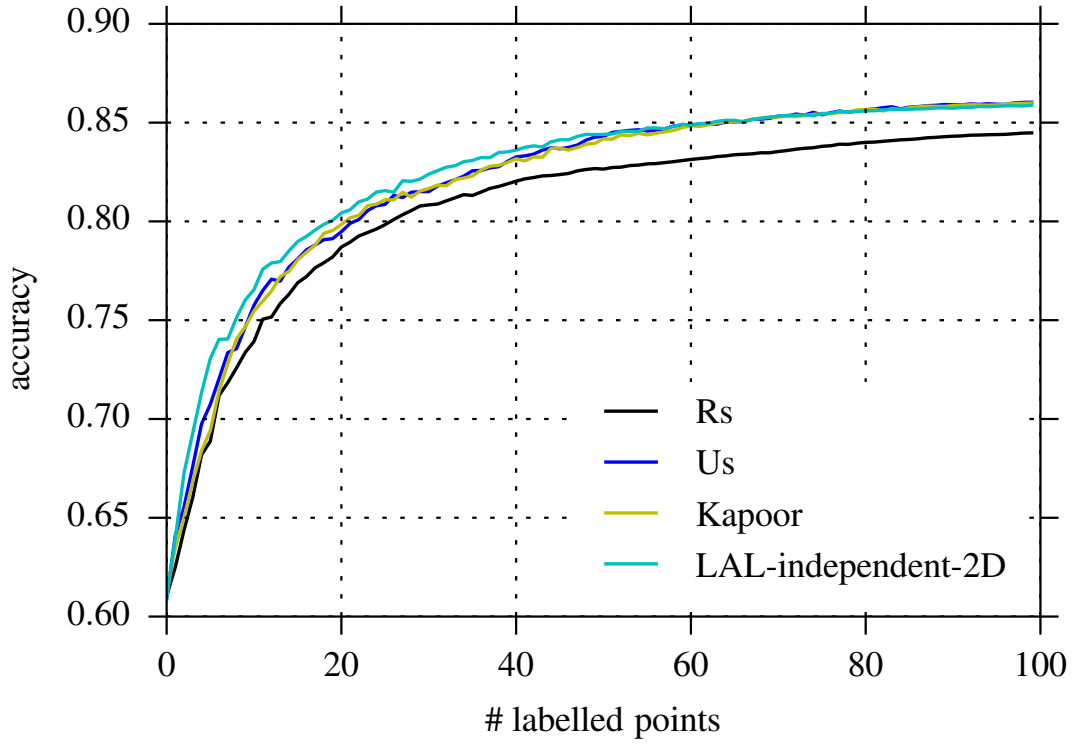

Figure 5: Experiments on synthetic data. 2 Gaussian clouds, GP classifier.

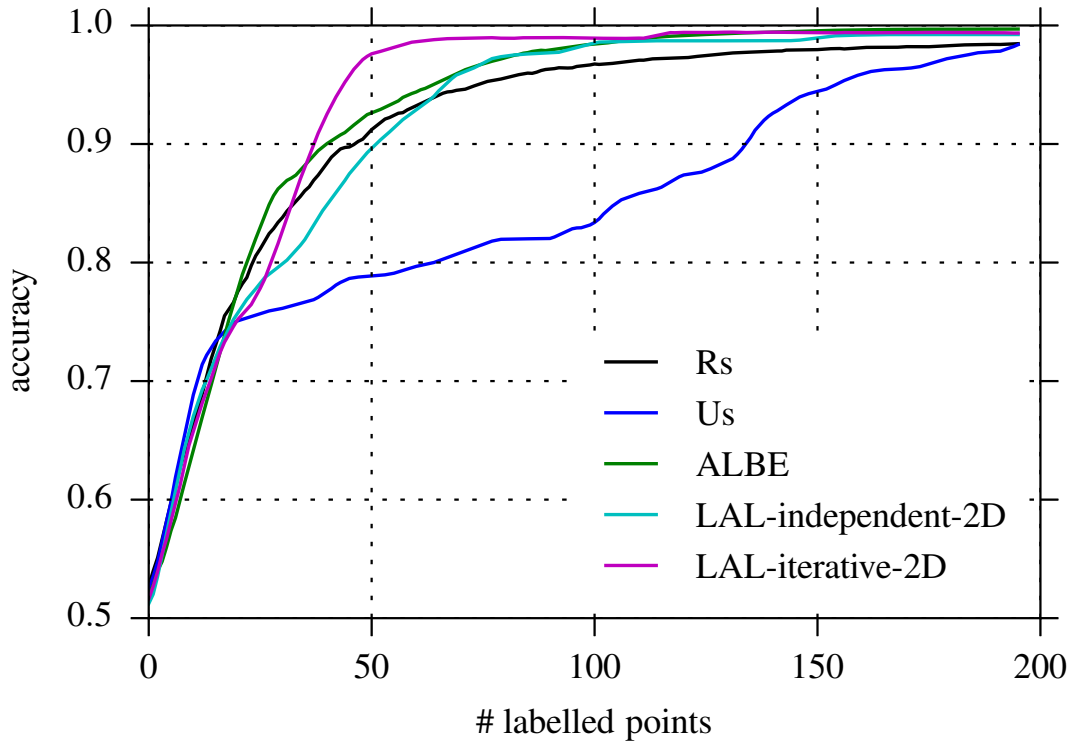

Figure 6: Experiments on synthetic data. XOR-like dataset, *Checkerboard*  $4 \times 4$ .

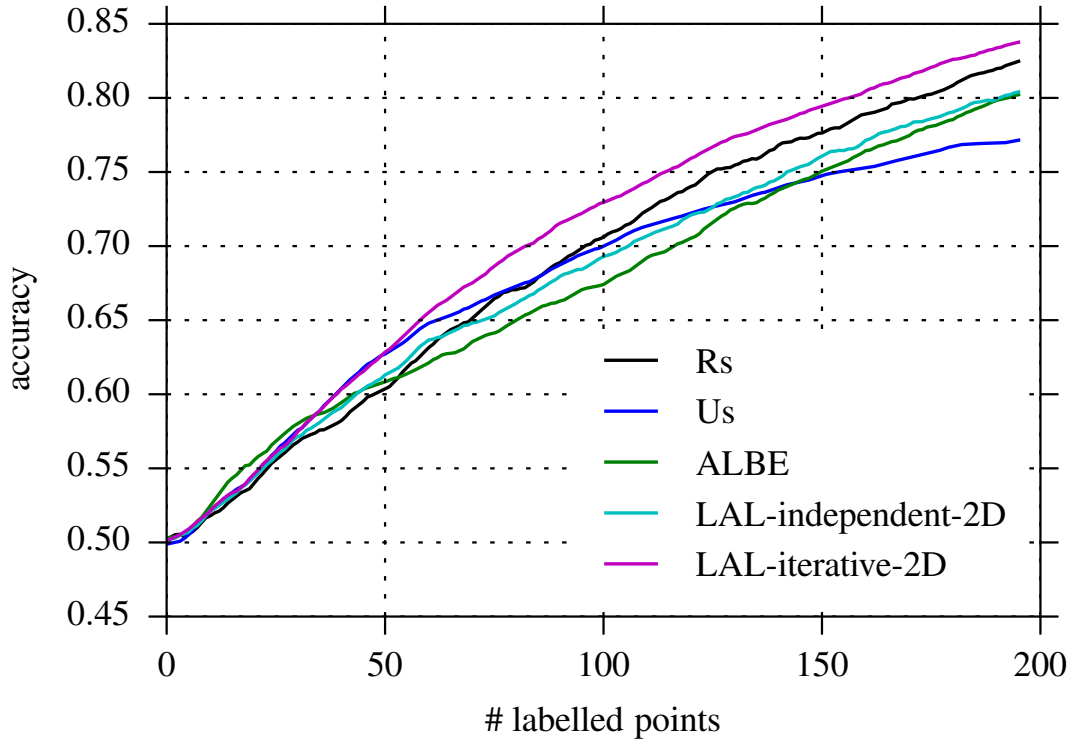

Figure 7: Experiments on synthetic data. XOR-like dataset, *Checkerboard*  $2 \times 2$ .

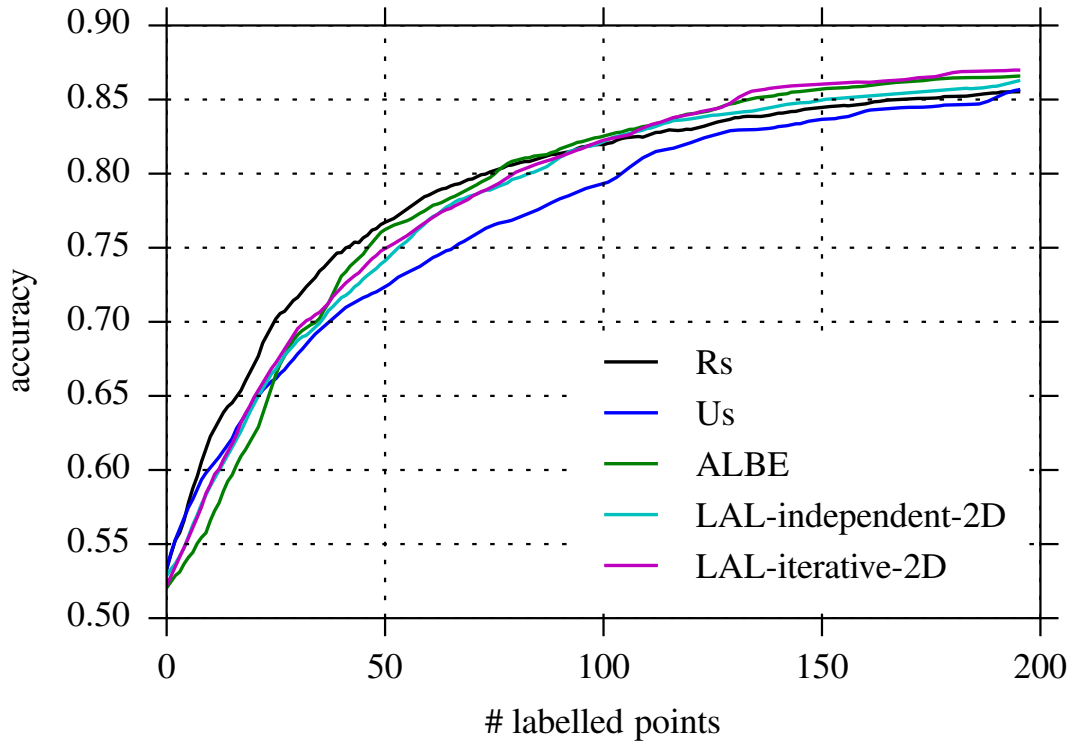

Figure 8: Experiments on synthetic data. XOR-like dataset, *Banana*.

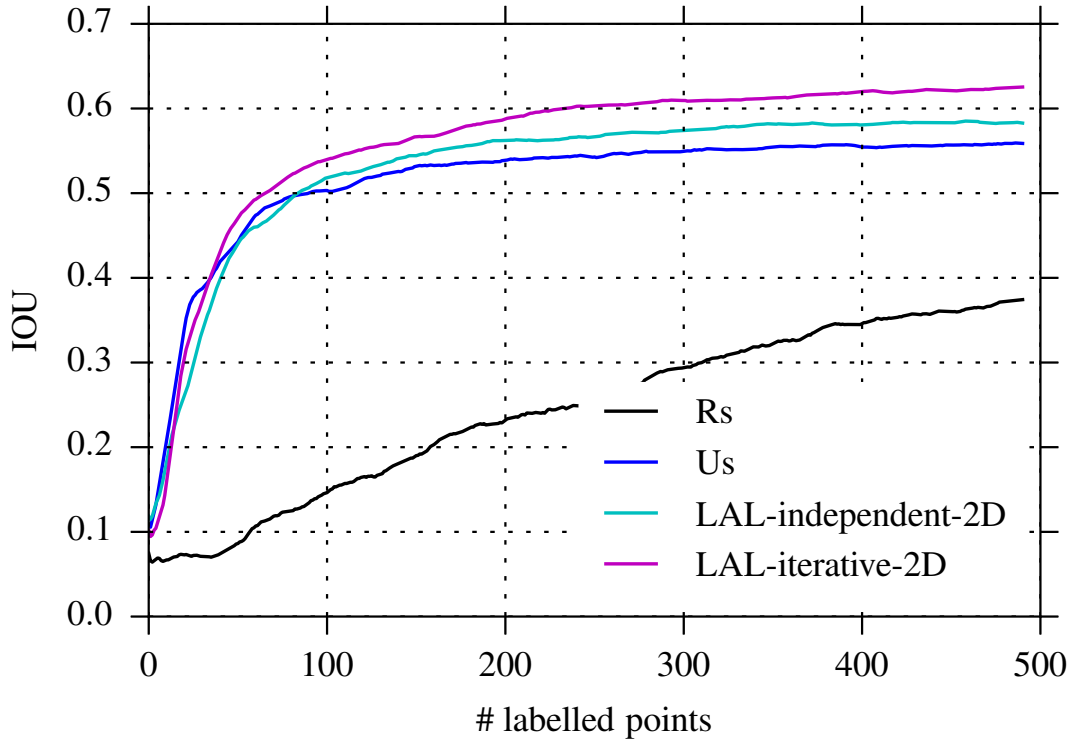

Figure 9: Experiments on real data with cold start, *Striatum*.

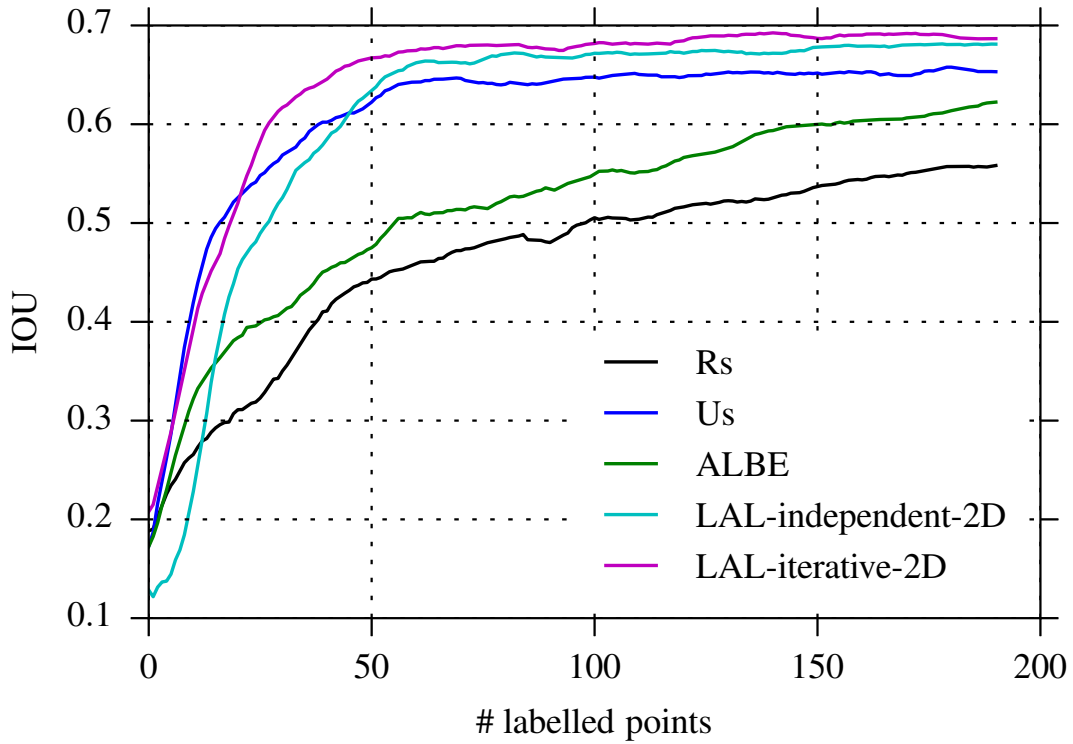

Figure 10: Experiments on real data with cold start, *Striatum mini*.



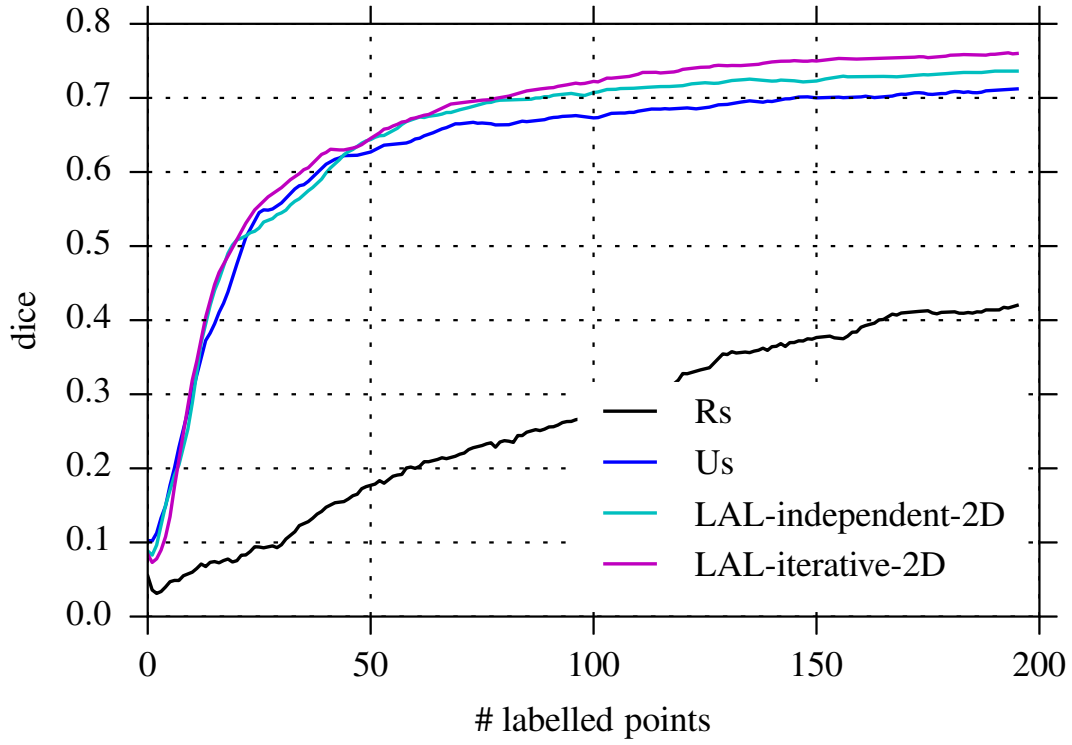

Figure 11: Experiments on real data with cold start, *MRI*.

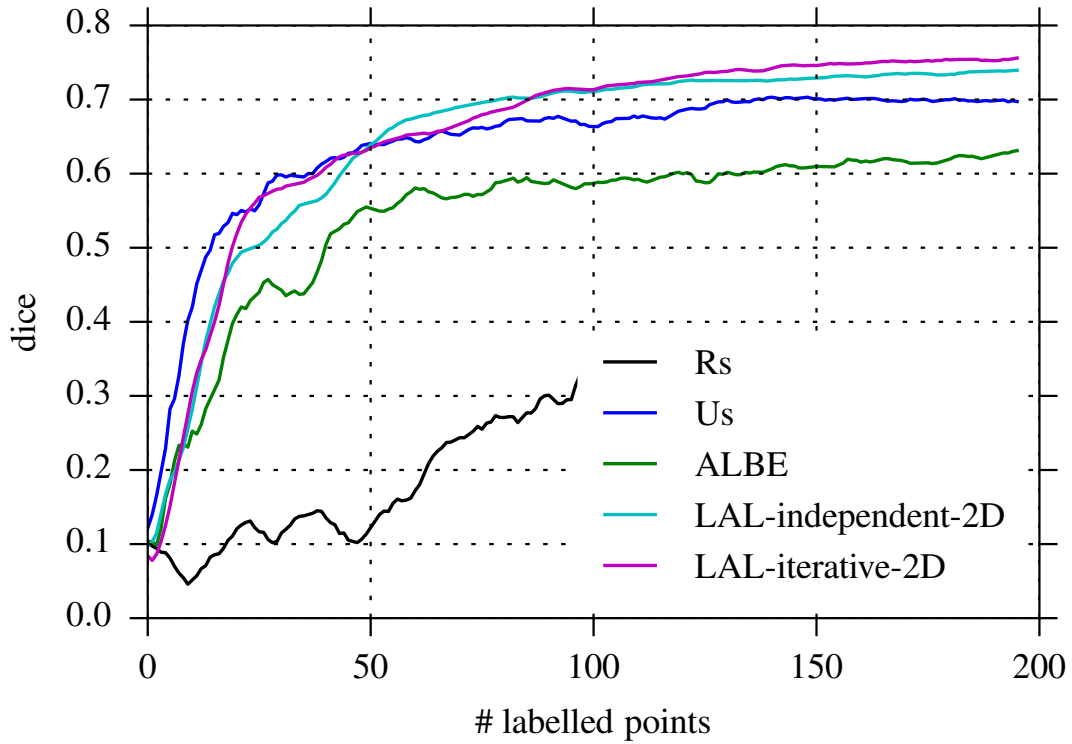

Figure 12: Experiments on real data with cold start, *MRI mini*.

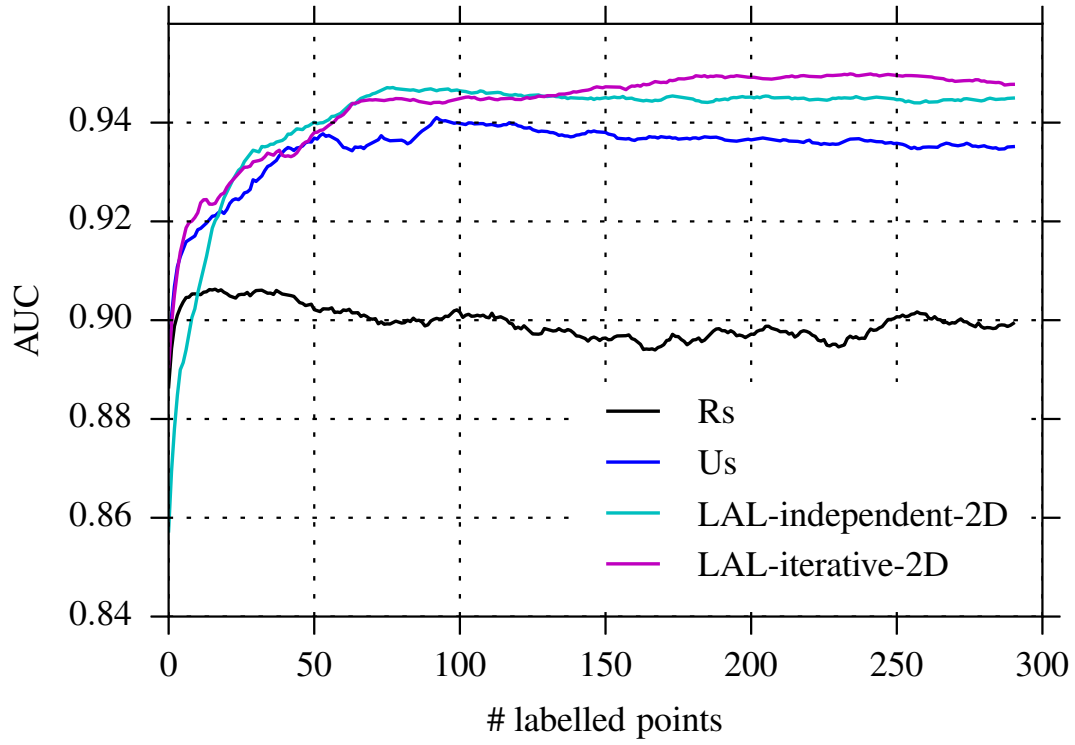

Figure 13: Experiments on real data with cold start, *Credit card*.

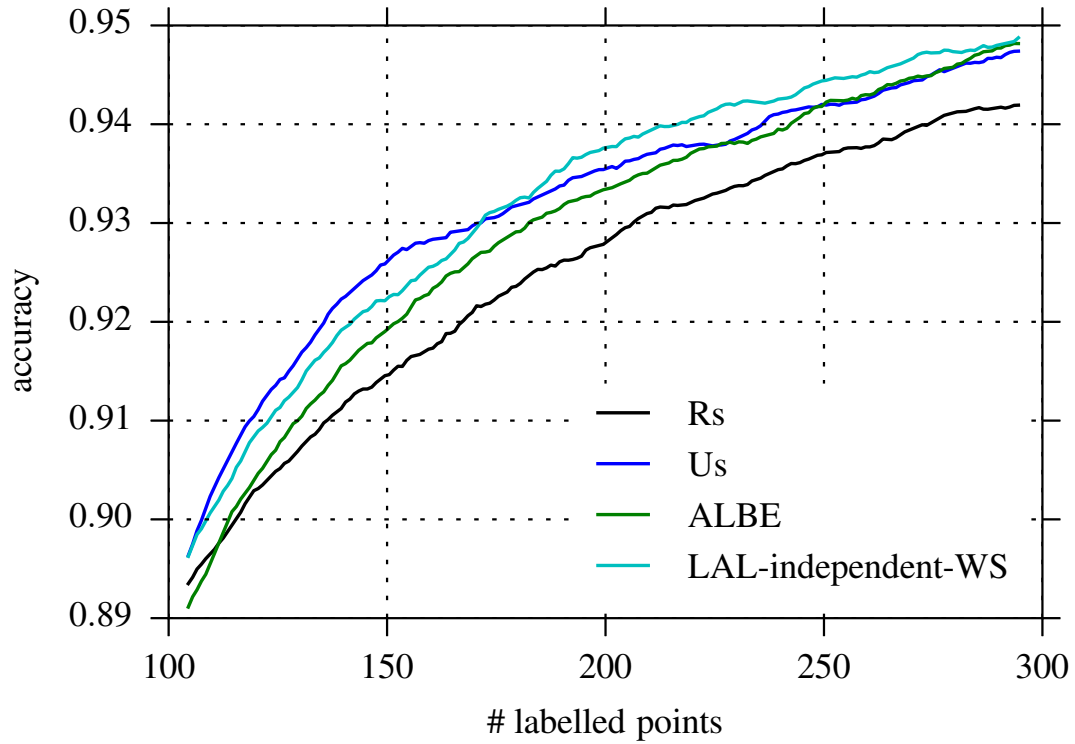

Figure 14: Experiments on real data with warm start, accuracy measure on *Splice*.

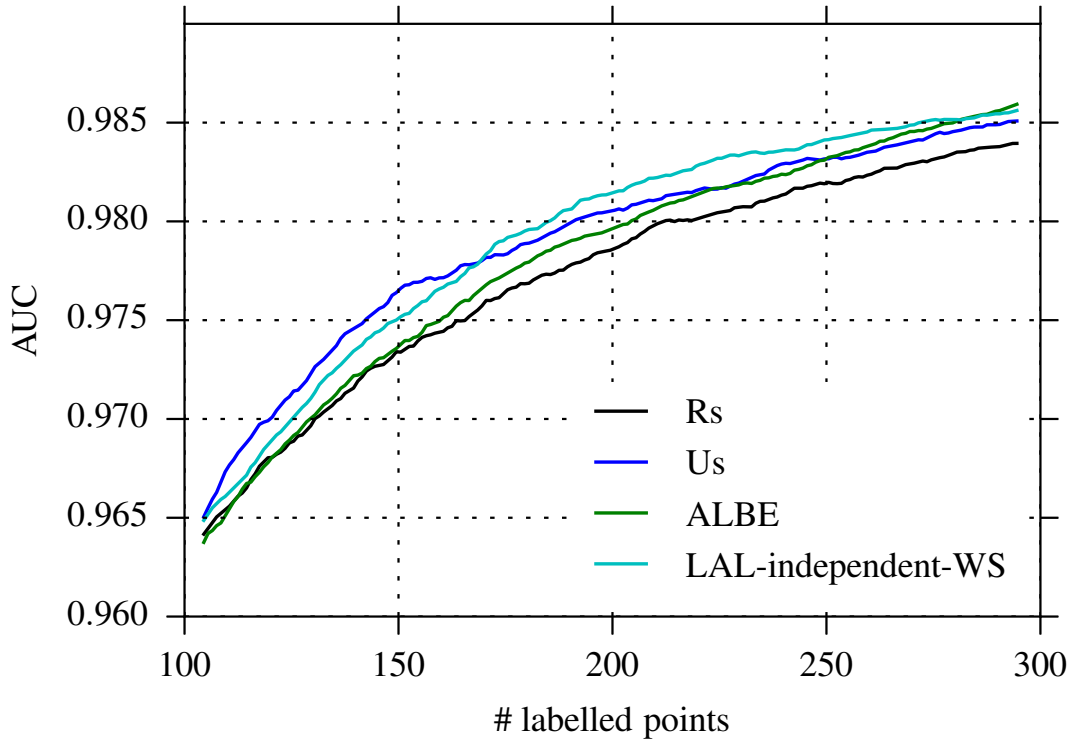

Figure 15: Experiments on real data with warm start, AUC measure on *Splice*.

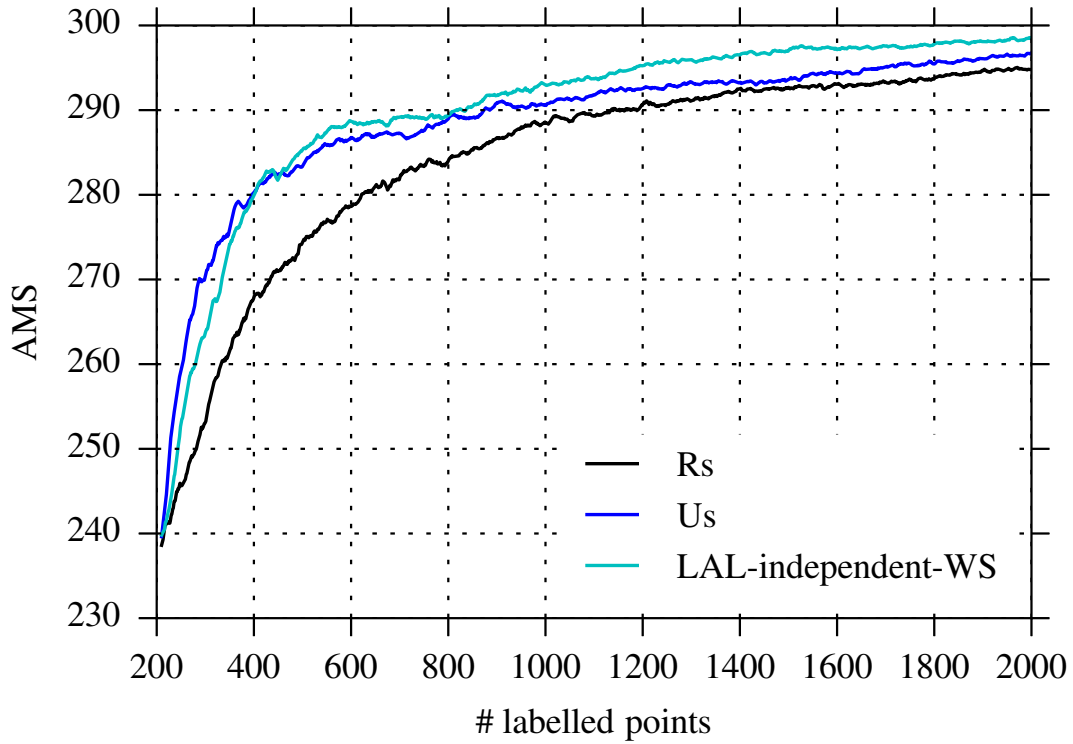

Figure 16: Experiments on real data with warm start, accuracy measure on *Higgs*.

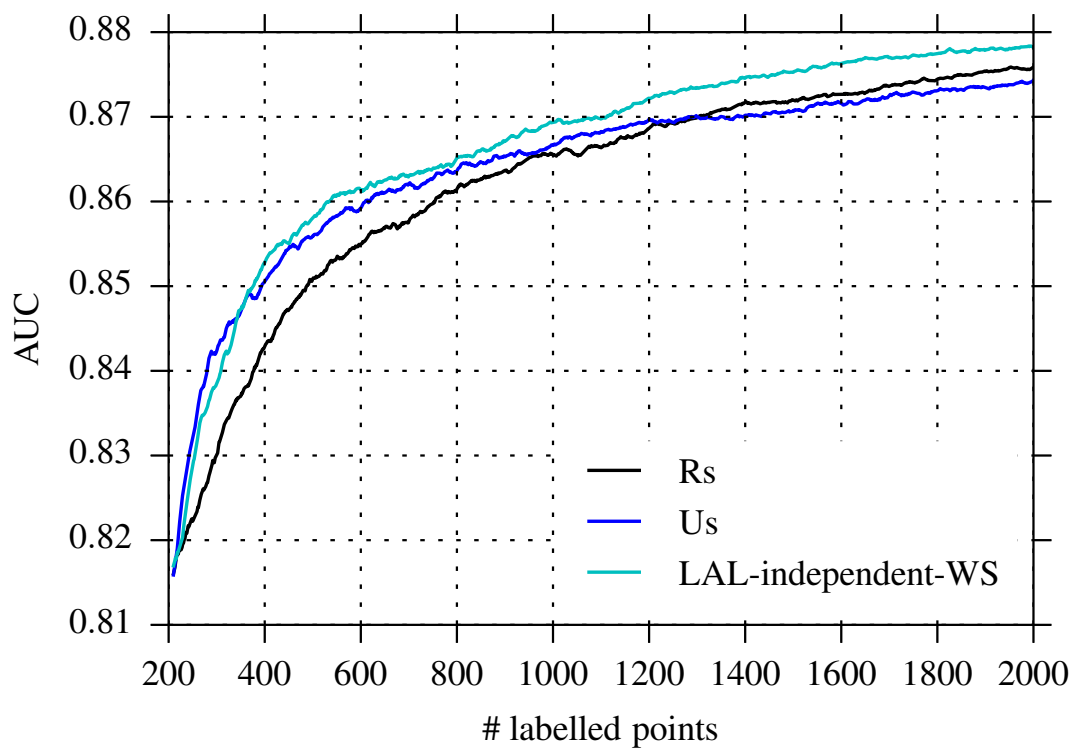

Figure 17: Experiments on real data with warm start, AUC measure on *Higgs*.

## 63 References

- 64 [1] R. Achanta, A. Shaji, K. Smith, A. Lucchi, P. Fua, and S. Suesstrunk. SLIC Superpixels  
65 Compared to State-Of-The-Art Superpixel Methods. *IEEE Transactions on Pattern Analysis and*  
66 *Machine Intelligence*, 34(11):2274–2282, November 2012.
- 67 [2] Andrea Dal Pozzolo, Olivier Caelen, Reid A Johnson, and Gianluca Bontempi. Calibrating  
68 probability with undersampling for unbalanced classification. In *Computational Intelligence,*  
69 *2015 IEEE Symposium Series on*, pages 159–166. IEEE, 2015.
- 70 [3] K. Konyushkova, R. Sznitman, and P. Fua. Introducing Geometry into Active Learning for Image  
71 Segmentation. In *International Conference on Computer Vision*, 2015.
- 72 [4] Ana Carolina Lorena, Gustavo EAPA Batista, André Carlos Ponce Leon Ferreira de Carvalho,  
73 and Maria Carolina Monard. Splice junction recognition using machine learning techniques. In  
74 *WOB*, pages 32–39, 2002.
- 75 [5] A. Lucchi, Y. Li, K. Smith, and P. Fua. Structured Image Segmentation Using Kernelized  
76 Features. In *European Conference on Computer Vision*, pages 400–413, October 2012.
- 77 [6] B. Menza, A. Jacas, et al. The Multimodal Brain Tumor Image Segmentation Benchmark  
78 (BRATS). *IEEE Transactions on Medical Imaging*, 2014.
